# Supplementary material for: Validation Study of Algorithms to Identify Malignant Tumors and Serious Infections in a Japanese Administrative Healthcare Database
Source: PubMed Central journal article supplement — Ann Clin Epidemiol. 2022 Jan 7;4(1):20–31. doi: 10.37737/ace.22004 (PMC10760479; doi:10.37737/ace.22004), 2022-01-07
Supplement: ace22004s1.pdf [file ace22004s1.pdf]

**Validation study of algorithms to identify malignant tumors and serious infections in a Japanese administrative healthcare database**

Atsushi Nishikawa<sup>1\*</sup>, Eiko Yoshinaga<sup>1</sup>, Masaki Nakamura<sup>2</sup>, Masayoshi Suzuki<sup>2</sup>, Keiji Kido<sup>1</sup>, Naoto Tsujimoto<sup>1</sup>, Taeko Ishii<sup>1</sup>, Daisuke Koide<sup>3</sup>

<sup>1</sup>Eli Lilly Japan K.K., Kobe, Japan; <sup>2</sup>Medical Data Vision Co., Ltd., Tokyo, Japan;

<sup>3</sup>Department of Biostatistics and Bioinformatics, Graduate School of Medicine, University of Tokyo, Tokyo, Japan

**SUPPLEMENTARY INFORMATION**

**Additional file 1**

**Supplementary Table S1** ICD-10 codes for identification of “all possible cases” of malignant tumor

**Supplementary Table S2** ICD-10 codes for identification of “all possible cases” of serious infection

**Supplementary Table S1** ICD-10 codes for identification of “all possible cases” of malignant tumor

| <b>Disease/Procedure</b>                                                                             | <b>ICD-10 code(s)<br/>Version 2013</b> | <b>Exceptions</b>                                                                                |
|------------------------------------------------------------------------------------------------------|----------------------------------------|--------------------------------------------------------------------------------------------------|
| HIV disease resulting in Kaposi sarcoma                                                              | B21.0                                  |                                                                                                  |
| HIV disease resulting in Burkitt lymphoma                                                            | B21.1                                  |                                                                                                  |
| HIV disease resulting in other types of non-Hodgkin lymphoma                                         | B21.2                                  |                                                                                                  |
| Malignant neoplasms of lip, oral cavity and pharynx                                                  | C00-C14                                | C00.5, C02.3, C02.4, C02.8, C04.8, C05.8, C06.8, C08.8, C09.8, C10.8, C11.8, C13.8, C14.2, C14.8 |
| Malignant neoplasms of digestive organs                                                              | C15-C26                                | C16.8, C17.3, C17.8, C18.8, C21.2, C21.8, C24.8, C26.0, C26.8                                    |
| Malignant neoplasms of respiratory and intrathoracic organs                                          | C30-C39                                | C31.8, C32.8, C38.8, C39                                                                         |
| Malignant neoplasms of bone and articular cartilage                                                  | C40-C41                                | C40.8, C40.9, C41.8                                                                              |
| Melanoma and other malignant neoplasms of skin                                                       | C43-C44                                | C44.8                                                                                            |
| Malignant neoplasms of mesothelial and soft tissue                                                   | C45-C49                                | C45.7, C46.0-C46.8, C47.8, C48.8, C49.8                                                          |
| Malignant neoplasm of breast                                                                         | C50                                    |                                                                                                  |
| Malignant neoplasms of female genital organs                                                         | C51-C58                                | C51.8, C54.8, C57.1-C57.8                                                                        |
| Malignant neoplasms of male genital organs                                                           | C60-C63                                | C60.8, C63.8                                                                                     |
| Malignant neoplasms of urinary tract                                                                 | C64-C68                                | C67.8, C68.1, C68.8, C68.9                                                                       |
| Malignant neoplasms of eye, brain and other parts of CNS                                             | C69-C72                                | C69.5, C69.8, C69.9, C71.8, C72.2, C72.8                                                         |
| Malignant neoplasms of thyroid and other endocrine glands                                            | C73-C75                                | C75.8, C75.9                                                                                     |
| Malignant neoplasms of ill-defined, secondary and unspecified sites                                  | C76-C80                                | C76.7, C76.8                                                                                     |
| Malignant neoplasms, stated or presumed to be primary, of lymphoid, hematopoietic and related tissue | C81-C96                                | C82.5, C84.9, C85.7, C86.4, C88.7, C88.9, C92.6, C92.8, C93.7, C95.7, C96.7, C96.9               |
| In situ neoplasms                                                                                    | D00-D09                                | D01.5, D01.7, D02.4, D03.2, D03.4, D03.5, D04.8, D05.7, D06.7, D07.6, D09.1, D09.3, D09.7        |
| Neoplasms of uncertain or unknown behaviour                                                          | D37-D48                                | D38.6, D39.9, D40.9, D41.7, D41.9, D43.7, D43.9, D44.2, D44.6, D46.0, D46.7, D47.9               |
| Other histiocytosis syndromes                                                                        | D76.3                                  |                                                                                                  |
| Other chronic pain                                                                                   | R52.2                                  |                                                                                                  |
| Poisoning by antineoplastic and immunosuppressive drugs                                              | T451                                   |                                                                                                  |

CNS central nervous system, *HIV* human immunodeficiency virus, *ICD-10* International Statistical Classification of Diseases and Related Health Problems 10th revision

**Supplementary Table S2** ICD-10 codes for identification of “all possible cases” of serious infection

| <b>Disease/Procedure</b>                                                       | <b>ICD-10 code(s),<br/>Version 2013</b> | <b>Exceptions</b>                                                                                                                                         |
|--------------------------------------------------------------------------------|-----------------------------------------|-----------------------------------------------------------------------------------------------------------------------------------------------------------|
| Intestinal infectious diseases                                                 | A00-A09                                 | A00.1, A01.2, A01.3, A02.8, A03.2, A03.8, A06.6, A07.0, A07.3                                                                                             |
| Tuberculosis                                                                   | A15-A19                                 | A15.3, A15.5, A15.7-A15.9, A16.0, A16.1, A17.1, A17.9, A19.0, A19.1, A19.8                                                                                |
| Certain zoonotic bacterial diseases                                            | A20-A28                                 | A20.0-A20.3, A20.7, A20.8, A21.1, A21.7, A21.8, A22.2, A22.8, A23.0-A23.3, A23.8, A24.2-A24.4, A25.0, A26.8, A26.9, A28.9                                 |
| Other bacterial diseases                                                       | A30-A49                                 | A30.0, A30.1, A30.3, A30.8, A32.0, A34, A36.1, A36.2, A37.0, A37.1, A37.8, A39.3, A40.8, A43.8, A44.1, A44.8                                              |
| Infections with a predominantly sexual mode of transmission                    | A50-A64                                 | A56.2, A56.8, A60.9, A63.8                                                                                                                                |
| Other spirochetal diseases                                                     | A65-A69                                 | A66.0, A66.3-A66.9, A67, A68.0, A69.8                                                                                                                     |
| Other diseases caused by chlamydiae                                            | A70-A74                                 | A71.0                                                                                                                                                     |
| Rickettsioses                                                                  | A75-A79                                 | A75.0, A75.1, A77.0, A77.3, A77.9, A79.0                                                                                                                  |
| Viral infections of the CNS                                                    | A80-A89                                 | A80.0-A80.2, A80.4, A81.9, A82.1, A83.1-A83.3, A83.5, A83.6, A83.8, A83.9, A84, A87.8, A88.8, A89                                                         |
| Arthropod-borne viral fevers & viral hemorrhagic fevers                        | A90-A99                                 | A92.1-A92.4, A93.0-A93.2, A95, A96, A98.0-A98.4, A98.8                                                                                                    |
| Viral infections characterized by skin & mucous membrane lesions               | B00-B09                                 | B04, B05.3, B05.4, B08.8                                                                                                                                  |
| Viral hepatitis                                                                | B15-B19                                 | B16.0, B16.1, B17.0, B18.0, B18.8, B19.0                                                                                                                  |
| HIV disease                                                                    | B20-B24                                 | B20.1, B20.5, B20.7-B20.9, B21.3, B21.7-B21.9, B22.7, B23.1, B23.2                                                                                        |
| Other viral diseases                                                           | B25-B34                                 | B27.8, B33.4                                                                                                                                              |
| Mycoses                                                                        | B35-B49                                 | B35, B36.2, B36.3, B38.3, B38.4, B38.7, B38.8, B39.0, B39.3-B39.5, B40.7-B40.9, B41, B42.0, B43.1, B43.8, B45.8, B46.2, B46.8, B48.1, B48.2               |
| Protozoal diseases                                                             | B50-B64                                 | B50.8, B51.0, B51.8, B52.0, B52.8, B53.1, B53.8, B55.0, B55.9, B56, B57.0, B57.1, B57.3-B57.5, B60.0, B64                                                 |
| Helminthiases                                                                  | B65-B83                                 | B65.0, B66.2, B67.1-B67.3, B67.6, B69.0, B69.1, B69.8, B70.1, B71.0, B71.8, B72, B73, B74.1-B74.4, B76.1, B76.8, B77.0, B81.3, B81.8, B83.3, B83.4, B83.9 |
| Pediculosis, acariasis & other infestations                                    | B85-B89                                 | B87.1-B87.3, B87.8, B87.9, B88.2, B88.8                                                                                                                   |
| Sequelae of infectious & parasitic diseases                                    | B90-B94                                 | B92, B94.2, B94.8, B94.9                                                                                                                                  |
| Other infectious diseases                                                      | B99                                     |                                                                                                                                                           |
| Hemophagocytic syndrome, infection-associated                                  | D76.2                                   |                                                                                                                                                           |
| Other histiocytosis syndromes                                                  | D76.3                                   |                                                                                                                                                           |
| Immunodeficiency following hereditary defective response to Epstein-Barr virus | D82.3                                   |                                                                                                                                                           |
| Thyroiditis                                                                    | E06.0, E06.1, E06.9                     |                                                                                                                                                           |
| Inflammatory diseases of the CNS                                               | G00-G06                                 | G01, G02, G03.8, G04.1, G05                                                                                                                               |
| Demyelinating diseases of the CNS                                              | G36.0, G37.0, G37.4                     |                                                                                                                                                           |
| Geniculate ganglionitis                                                        | G51.1                                   |                                                                                                                                                           |
| Mononeuritis multiplex                                                         | G58.7                                   |                                                                                                                                                           |
| Hereditary and idiopathic neuropathy, unspecified                              | G60.9                                   |                                                                                                                                                           |
| Polyneuropathy, unspecified                                                    | G62.9                                   |                                                                                                                                                           |
| Disorders of eyelid, lacrimal system and orbit                                 | H00-H06                                 | H00.1, H01.1, H01.8, H01.9, H02, H03, H04.1, H04.2, H04.5, H04.6, H04.8, H04.9, H05.2-H05.5, H05.8, H05.9, H06                                            |
| Disorders of conjunctiva                                                       | H10.0, H10.2, H10.4                     |                                                                                                                                                           |
| Corneal ulcer                                                                  | H16.0                                   |                                                                                                                                                           |
| Other keratitis                                                                | H16.8                                   |                                                                                                                                                           |
| Unspecified keratitis                                                          | H16.9                                   |                                                                                                                                                           |
| Other iridocyclitis                                                            | H20.8                                   |                                                                                                                                                           |
| Chorioretinal inflammation, unspecified                                        | H30.9                                   |                                                                                                                                                           |
| Other specified retinal disorders                                              | H35.8                                   |                                                                                                                                                           |
| Purulent endophthalmitis                                                       | H44.0                                   |                                                                                                                                                           |
| Unspecified disorder of globe                                                  | H44.9                                   |                                                                                                                                                           |
| Optic neuritis                                                                 | H46                                     |                                                                                                                                                           |
| Diseases of external ear                                                       | H60-H61                                 | H60.4, H60.5, H60.8, H61.1-H61.3, H61.8, H61.9                                                                                                            |
| Diseases of middle ear and mastoid                                             | H65-H73                                 | H67, H68.1, H69, H70.8, H71, H72, H73.9                                                                                                                   |
| Vestibular neuronitis                                                          | H81.2                                   |                                                                                                                                                           |

|                                                              |                                                                                                            |                                                                           |
|--------------------------------------------------------------|------------------------------------------------------------------------------------------------------------|---------------------------------------------------------------------------|
| Labyrinthitis                                                | H83.0                                                                                                      |                                                                           |
| Disorders of acoustic nerve                                  | H93.3                                                                                                      |                                                                           |
| Acute rheumatic fever                                        | I00-I01                                                                                                    | I01.1, I01.8, I01.9                                                       |
| Other forms of heart disease                                 | I30, I31, I33, I38,<br>I40, I51.4, I51.8,                                                                  | I31.2, I31.3                                                              |
| Diseases of arteries, arterioles and capillaries             | I71.2, I71.4, I72.9,<br>I74.0, I77.6                                                                       |                                                                           |
| Diseases of veins, lymphatic vessels & lymph nodes, NOC      | I80.9, I88, I89.1                                                                                          | I88.8                                                                     |
| Acute upper respiratory infections                           | J00-J06                                                                                                    | J01.8                                                                     |
| Influenza and pneumonia                                      | J09-J18                                                                                                    | J10.0, J10.8, J16.8, J17, J18.2                                           |
| Other acute lower respiratory infections                     | J20-J22                                                                                                    | J20.7, J21.8                                                              |
| Other diseases of upper respiratory tract                    | J30-J39                                                                                                    | J30, J32.8, J33, J34.1-J34.3, J35.3, J35.9, J38.0-<br>J38.6, J39.3, J39.9 |
| Chronic lower respiratory diseases                           | J40-J44                                                                                                    | J41.8, J43, J44.0, J44.1, J44.9                                           |
| Suppurative & necrotic conditions of lower respiratory tract | J85-J86                                                                                                    |                                                                           |
| Pleural effusion, NOC                                        | J90                                                                                                        |                                                                           |
| Diseases of mediastinum, NOC                                 | J98.5                                                                                                      |                                                                           |
| Disorders of diaphragm                                       | J98.6                                                                                                      |                                                                           |
| Diseases of oral cavity, salivary glands and jaws            | K05.0-K05.3, K05.5,<br>K06.8, K07.6, K10.2,<br>K10.3, K11.2, K11.3,<br>K12.0-K12.3, K13.0,<br>K14.0, K14.2 |                                                                           |
| Diseases of oesophagus, stomach & duodenum                   | K20, K22.1, K29.1,<br>K29.7-K29.9, K31.8                                                                   |                                                                           |
| Diseases of appendix                                         | K35.3, K35.8, K36,<br>K37                                                                                  |                                                                           |
| Noninfective gastroenteritis & colitis, unspecified          | K52.9                                                                                                      |                                                                           |
| Other diseases of the intestines                             | K57.1, K57.3, K57.9,<br>K61, K62.6, K62.8                                                                  |                                                                           |
| Peritonitis                                                  | K65.0, K65.8, K65.9                                                                                        |                                                                           |
| Other inflammatory liver diseases                            | K75.0, K75.1, K75.9                                                                                        |                                                                           |
| Disorders of gallbladder, biliary tract & pancreas           | K81.0, K81.1, K81.9,<br>K83.0, K85.0, K85.9                                                                |                                                                           |
| Other postprocedural disorders of digestive system, NOC      | K91.8                                                                                                      |                                                                           |
| Infections of the skin and subcutaneous tissue               | L00-L08                                                                                                    | L00, L01.1, L04.1-L04.3, L04.8, L05, L08.1, L08.8                         |
| Other dermatitis                                             | L30.3, L30.9                                                                                               |                                                                           |
| Pustulosis palmaris et plantaris                             | L40.3                                                                                                      |                                                                           |
| Cicatricial alopecia [scarring hair loss]                    | L66.3, L66.4                                                                                               |                                                                           |
| Other follicular disorders                                   | L73.1, L73.2, L73.9                                                                                        |                                                                           |
| Other eccrine sweat disorders                                | L74.8                                                                                                      |                                                                           |
| Other disorders of the skin and subcutaneous tissue          | L89.9, L98.0                                                                                               |                                                                           |
| Pyogenic arthritis                                           | M00                                                                                                        | M00.8                                                                     |
| Spondylopathies                                              | M46.2, M46.3,<br>M46.5, M46.9,<br>M47.2                                                                    |                                                                           |
| Infective myositis                                           | M60.0                                                                                                      |                                                                           |
| Other soft tissue disorders                                  | M71.1, M72.6,<br>M72.8                                                                                     |                                                                           |
| Osteomyelitis                                                | M86                                                                                                        | M86.4                                                                     |
| Glomerular diseases                                          | N00.9, N01.7,<br>N01.9, N05.9                                                                              |                                                                           |
| Renal tubulo-interstitial diseases                           | N10, N12, N15.1,<br>N15.9                                                                                  |                                                                           |
| Other specified disorders of kidney and ureter               | N28.8                                                                                                      |                                                                           |
| Other diseases of urinary system                             | N30.2, N30.3,<br>N30.8, N30.9,<br>N32.3, N34.0-N34.2,<br>N36.1, N39.0                                      |                                                                           |
| Diseases of male genital organs                              | N41.0-N41.2, N41.9,<br>N45.0, N45.9,<br>N48.1, N48.2,<br>N49.1, N49.2, N50.0                               |                                                                           |
| Inflammatory disorders of breast                             | N61                                                                                                        |                                                                           |
| Inflammatory diseases of female pelvic organs                | N70-N77                                                                                                    | N73.6, N73.8, N73.9, N74, N75.0, N75.9, N76.8                             |

|                                                                            |                                                              |       |
|----------------------------------------------------------------------------|--------------------------------------------------------------|-------|
| Infections of genitourinary tract in pregnancy                             | O23                                                          | O23.3 |
| Maternal care for (suspected) damage to fetus from viral disease in mother | O35.3                                                        |       |
| Infection of amniotic sac and membranes                                    | O41.1                                                        |       |
| Complications predominantly related to the puerperium                      | O85, O86, O91                                                | O86.8 |
| Other obstetric conditions, NOC                                            | O98.3, O99.5                                                 |       |
| Gangrene, NOC                                                              | R02                                                          |       |
| Pleurisy                                                                   | R09.1                                                        |       |
| Post-traumatic wound infection, NOC                                        | T79.3                                                        |       |
| Complications of surgical and medical care, NOC                            | T81.4, T82.6, T82.7,<br>T83.5, T84.5, T84.6,<br>T84.7, T85.7 |       |

*CNS* central nervous system, *HIV* human immunodeficiency virus, *ICD-10* International Statistical Classification of Diseases and Related Health Problems 10th revision, *NOC* not otherwise classified
